# Supplementary material for: Rôle de la P-glycoprotéine dans le devenir des lactones macrocycliques antiparasitaires chez l'animal
Source: Atypon-hosted journal article supplement (doi:10.1056/nejmoa050151), 2009-01-01
Supplement: nejmoa050151sa1.pdf [file nejmoa050151sa1.pdf]

## Supplementary Appendix

This appendix has been provided by the authors to give readers additional information about their work.

Supplement to: Petersen RC, Thomas RG, Grundman M, et al. Vitamin E and donepezil for the treatment of mild cognitive impairment. *N Engl J Med* 2005;352:2379-88.

## Appendix table

## Inclusion criteria

1. Amnesic MCI
  - a. Memory complaint corroborated by an informant
  - b. Abnormal memory function
    - Impaired delayed recall on one paragraph from the Wechsler Memory Scale-Revised Logical Memory II
    - Cutoff scores:
      - $\leq 8$  16 years of education
      - $\leq 4$  8-15 years of education
      - $\leq 2$  0-7 years of education
  - c. General cognition and functional performance sufficiently preserved so that a diagnosis of AD cannot be made
  - d. Not demented
    - Not meet National Institute of Neurological and Communicative Disorders and Stroke/Alzheimer's Disease and Related Disorders Association Criteria by clinical judgment
2. Age 55-90 years, inclusive
3. Study informant available
4. MMSE 24-30
5. Adequate vision and hearing for neuropsychological testing
6. Normal vitamin B12 level and thyroid function studies and non-reactive RPR
7. Electrocardiogram normal or no clinically significant abnormalities
8. CDR 0.5
  - Memory box score 0.5 or 1
  - No box score greater than 1
9. All subjects and study informants signed written consent
  - Approved by local IRB's

## Exclusion criteria

1. Significant cerebral vascular disease
  - Modified Hachinski  $> 4$
2. Depression
  - Hamilton Depression Rating Scale  $> 12$
3. Central nervous system infarct, infection or focal lesions of clinical significance on CT or MRI scans
4. Medical diseases or psychiatric disorders that could interfere with study participation
5. Pregnant, lactating or of child bearing potential
6. Taking vitamin supplements, other supplements or a multi-vitamin
7. Restrictions on concomitant medication usage, including those with significant cholinergic or anticholinergic effects or potential adverse effects on cognition
